# Supplementary material for: IL-4R+SELL+ Naïve B Cell Expansion correlates with functional cure in PEG-IFNα Treated Chronic Hepatitis B Patients
Source: Research Square preprint supplement (doi:10.21203/rs.3.rs-7813973/v1), 2025-11-06
Supplement: Supplementary file 2 [file 5236e7031ea486f2b6c256e4.xlsx]

## Sheet: Supplementary Table 1
Supplementary Table 1. Characteristics of the patients for flow cytometry analysis.
	Group	Age (Year)	Gender	Baseline HBsAg (IU/ml)	Baseline HBeAg / HBeAb	Baseline ALT (IU/ml)	Baseline AST (IU/ml)	HBsAg of Sampling (IU/ml)	Sampling Time (weeks)	HBsAg at 96week
Patient 1	Cured	30	F	723.7	-/-	11	17	202.9	11	0.05
Patient 2	Cured	47	F	984.2	-/+	20	24	0.207	42	0.05
Patient 3	Cured	35	M	462.2	-/+	21	23	2.59	43	0.05
Patient 4	Cured	31	M	49.34	-/+	15	19	0.055	28	0.05
Patient 5	Cured	36	M	34.79	-/+	58	16	34.79	0	0.05
Patient 6	Cured	33	M	1269	-/+	32	24	804	5	0.05
Patient 7	Cured	34	M	11.12	-/+	42	25	0.05	20	0.05
Patient 8	Cured	32	M	381.2	-/-	25	24	0.05	92	0.05
Patient 9	Cured	49	M	89	-/+	25	22	0.05	27	0.05
Patient 10	Cured	46	M	53.03	-/-	28	23	0.05	44	0.05
Patient 11	Cured	37	M	326.2	-/+	62	27	0.05	63	0.05
Patient 12	Uncured	40	F	69.4	-/+	16	20	42.55	27	19.5
Patient 13	Uncured	49	M	578.1	-/+	32	34	189.9	46	54.6
Patient 14	Uncured	35	F	685.3	-/+	19	24	188.2	28	174
Patient 15	Uncured	50	M	29.14	-/+	14	22	1.25	12	1.25
Patient 16	Uncured	41	M	280.8	-/+	45	29	170.1	7	180
Patient 17	Uncured	40	M	295.7	-/-	19	20	286.4	4	151
Patient 18	Uncured	39	F	318.9	-/+	13	21	320.4	11	5.55
Patient 19	Uncured	40	M	1140	-/+	38	21	1304	6	182
Patient 20	Uncured	42	M	815.9	-/+	18	17	602.8	20	520
Patient 21	Uncured	35	F	1008	-/+	11	18	129.1	27	129
