# Supplementary material for: IL-4R+SELL+ Naïve B Cell Expansion correlates with functional cure in PEG-IFNα Treated Chronic Hepatitis B Patients
Source: Research Square preprint supplement (doi:10.21203/rs.3.rs-7813973/v1), 2025-11-06
Supplement: Supplementary file 3 [file 6084b88d782764e5c9a41118.xlsx]

## Sheet: Table
Table1. Characteristics of the patients for single-cell RNA sequencing.
	Cured (n = 6)	Uncured (n = 5)	p.value
Age (Year)	40 (36 - 47)	42 (39 - 46)	0.65
Gender (F/M)	0.2	0.25	>0.99
HBsAg# (IU/ml, Baseline)	138.4 (28.9 - 943.5)	419.9 ( 297.8 - 1045.0 )	0.55
HBeAg# (-/+)	6/0	5/0
Anti-HBe (-/+)	0/6	0/5
HBV DNA# (IU/ml, Baseline)	< 40	< 40	0.99
ALT # (IU/ml, Baseline)	31.0 (17.8 - 71.0)	45.0 (28.5 - 51.0)	0.31
HBsAg* (IU/ml, Sample collection)	0.05	147.5 (8.6 - 291.2)	<0.01
ALT* (IU/ml, Sample collection)	58.0 (27.8 - 179.0）	45.0 (37.5 - 45.5)	0.82
Median (25% - 75%)
# Represent the HBsAg level , HBeAg, HBV DNA and ALT at the time of PEG-IFNα administration.
* Represent the HBsAg level and ALT at the time of sample collection.
