# Supplementary material for: IL-4R+SELL+ Naïve B Cell Expansion correlates with functional cure in PEG-IFNα Treated Chronic Hepatitis B Patients
Source: Research Square preprint supplement (doi:10.21203/rs.3.rs-7813973/v1), 2025-11-06
Supplement: Supplementary file 4 [file 69bd943040526ec3ff070c9f.xlsx]

## Sheet: Supplementary Table 2
Supplementary Table 2. Characteristics of the patients with NAs treatment.
	Low HBsAg (n = 8)	High HBsAg (n = 9)	p.value
Age (Year)	39.0 (31.0 - 46.3)	41.0 (34.0 - 42.0)	0.855
Gender (F/M)	2/6	3/6
HBsAg (IU/ml)	64.6 (23.3 - 86.0)	2497.0 (1915.0 - 3725.0)	<0.001
HBeAg (+/-)	1/7	2/7
HBV DNA (IU/ml)	<40	<40
ALT (IU/ml)	34.0 (25.5 - 51.8)	19.0 (10.5 - 39.5)	0.132
AST (IU/ml)	27.5 (17.3 - 41.0)	21.0 (17.0 - 26.5)	0.409
Median (25%-75%)
