# Supplementary material for: IL-4R+SELL+ Naïve B Cell Expansion correlates with functional cure in PEG-IFNα Treated Chronic Hepatitis B Patients
Source: Research Square preprint supplement (doi:10.21203/rs.3.rs-7813973/v1), 2025-11-06
Supplement: Supplementary file 5 [file 70561cbdd2955265859f989f.xlsx]

## Sheet: Supplementary Table 3
Supplementary Table 3. Antibodies for flow cytometry
name	supplier	Cat no.	Clone no.
CD3-BUV395	BD biosciences	564001	SK7
CD10-PE-CF594	BD biosciences	562396	HI10a
CD19-Percp-cy5.5	BioLegend	363016	SJ25C1
CD21-BUV737	BD biosciences	612788	B-ly4
CD27-BV510	BioLegend	302836	O323
CD38-BV711	BioLegend	303528	HIT2
CD69-PE-cy7	BioLegend	310912	FN50
CD86-BV605	BioLegend	374214	BU63
CD23-APC	BioLegend	338514	EBVCS-5
IL-4R-PE	BioLegend	355004	G077F6
SELL-BV786	BD biosciences	565311	SK11
CD83-BV421	BD biosciences	562630	HB15e
Anti-mouse IgG-FITC	BioLegend	405305	Poly4053
Live/Dead-FV700	BD biosciences	564997
Fixation/Permeabilization Kit	BD biosciences	554714
