# Supplementary figures and images for: IL-4R+SELL+ Naïve B Cell Expansion correlates with functional cure in PEG-IFNα Treated Chronic Hepatitis B Patients
Source: Research Square preprint supplement (doi:10.21203/rs.3.rs-7813973/v1), 2025-11-06

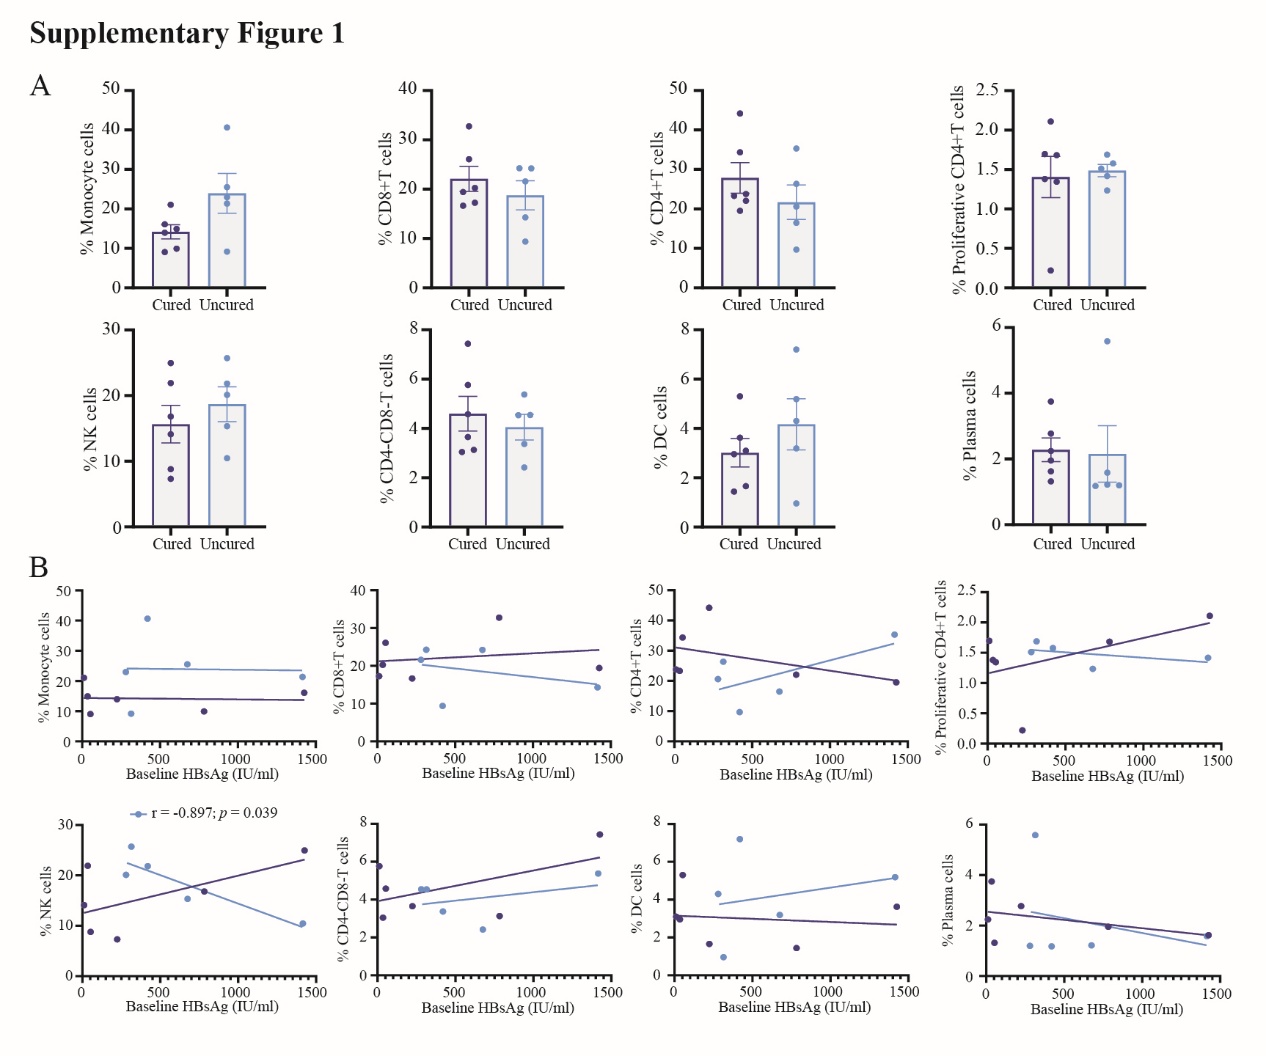


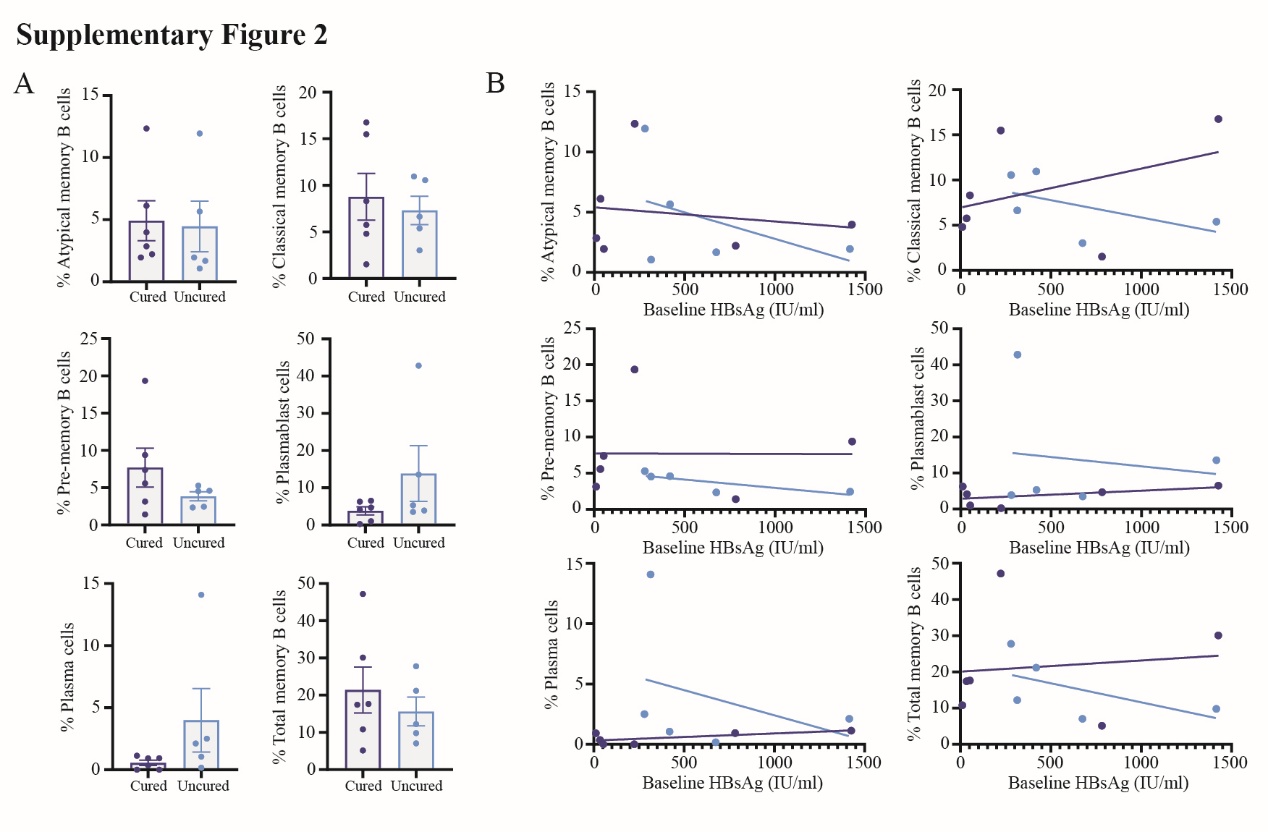


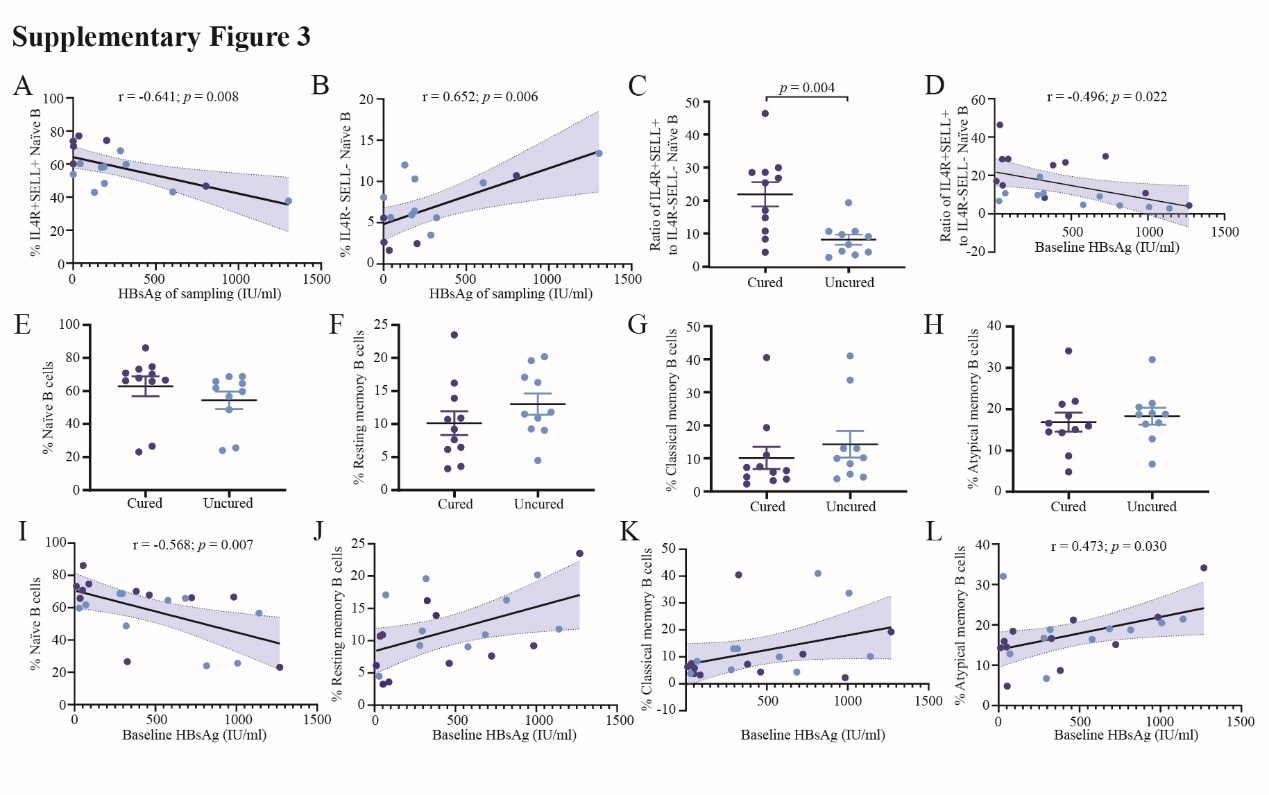


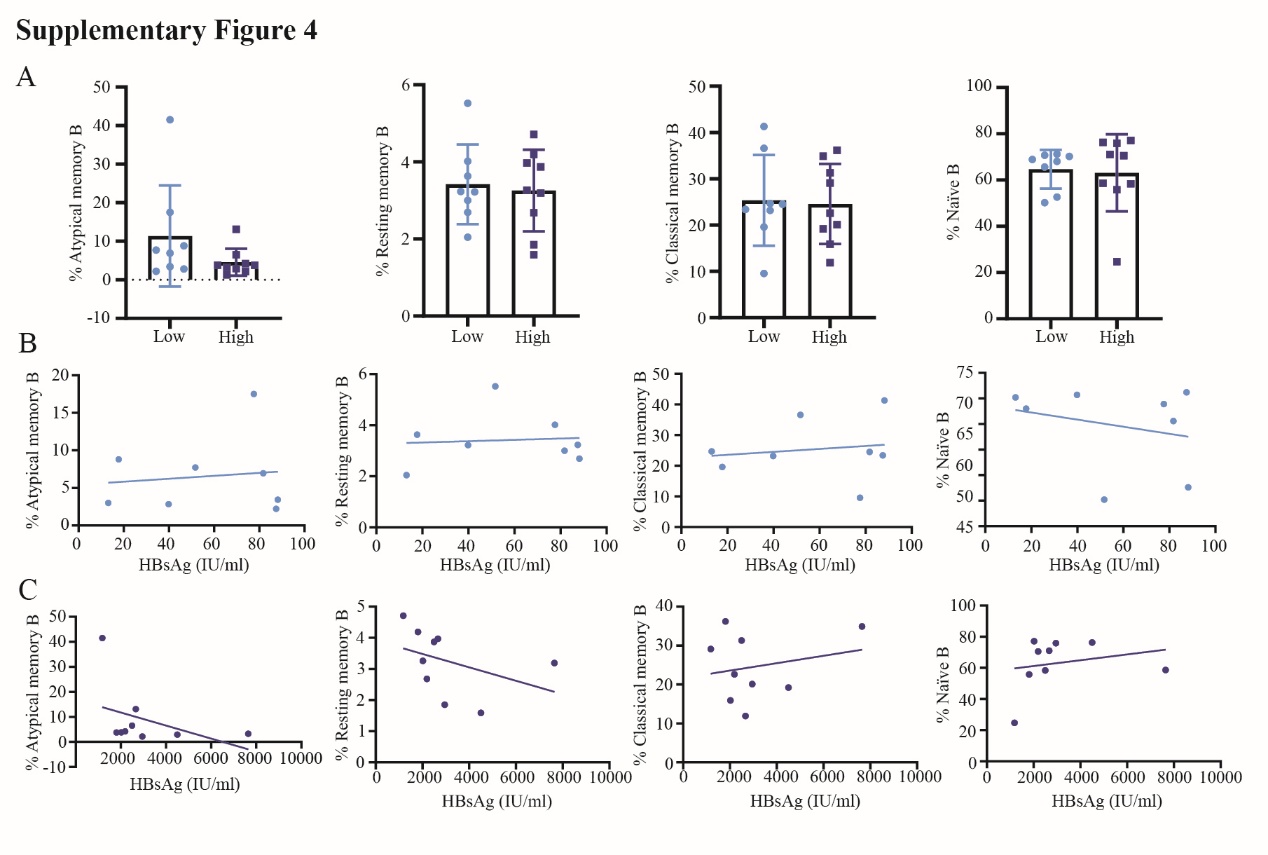


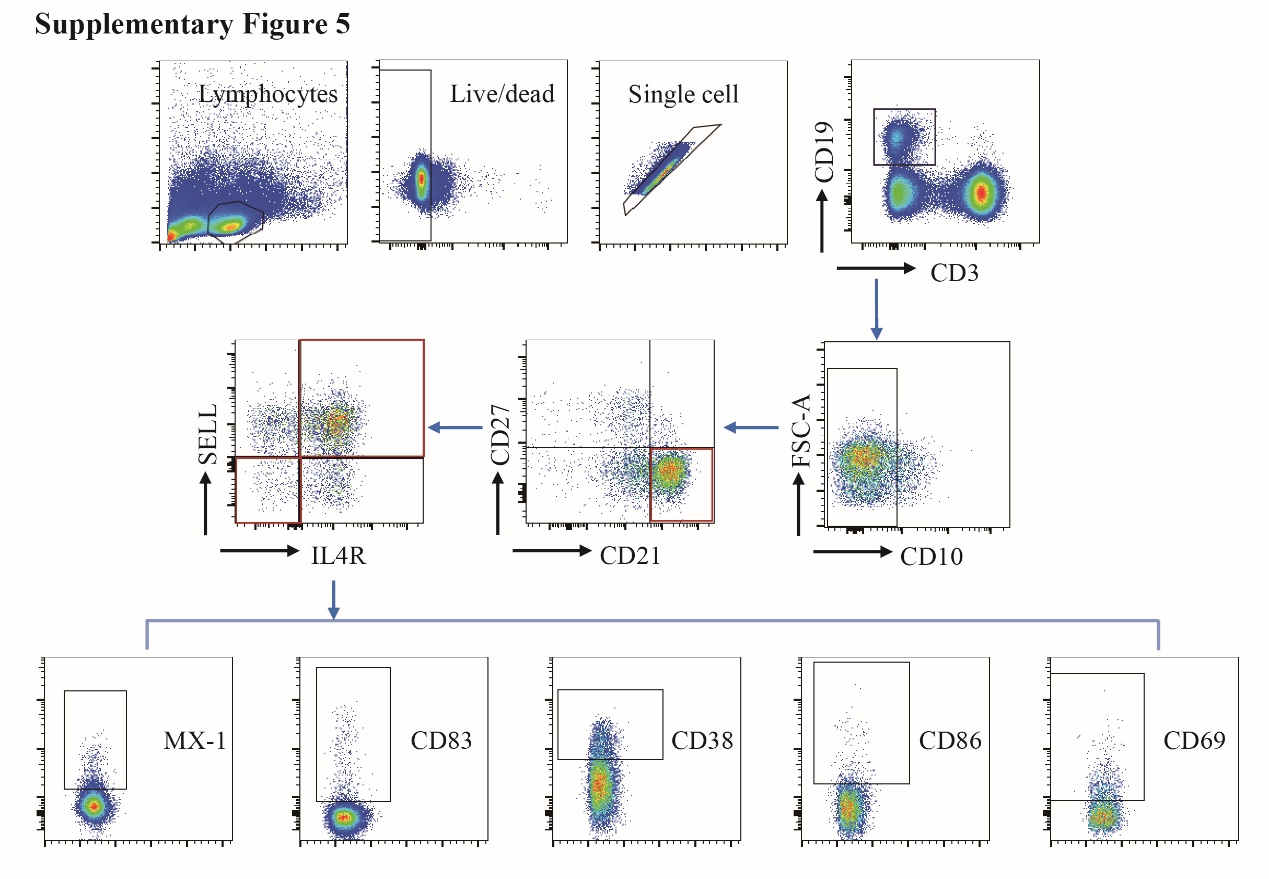

Supplement: Supplementary file 1 [file 0abf2db1a46baedb66c7373e.docx]
